# Supplementary material for: Antennae hold a key to Varroa-sensitive hygiene behaviour in honey bees
Source: PubMed Central journal article supplement (PMC4441115; doi:10.1038/srep10454), 2015-05-22
Supplement: srep10454-s1.pdf [file srep10454-s1.pdf]

## Antennae hold a key to *Varroa*-sensitive hygiene behaviour in honey bees

Fanny Mondet, Cédric Alaux, Dany Severac, Marine Rohmer,  
Alison R. Mercer and Yves Le Conte

### Supplementary information

#### Supplementary Table S1. Age range of bees sampled and analysed by RNA-seq

The table indicates the sample numbers for RNA extraction (n = 4 pairs of antennae per sample), for RNA-seq (n = 8 pairs of antennae per sample) and the corresponding ages for each sample.

| Behaviour | Transcriptomic sample | RNA Extraction pool | Age (days)  |
|-----------|-----------------------|---------------------|-------------|
| VSH       | 1                     | 1                   | 7.5 ± 1     |
|           |                       | 2                   | 7 ± 1.2     |
|           | 2                     | 3                   | 9.75 ± 0.5  |
|           |                       | 4                   | 9.75 ± 0.5  |
|           | 3                     | 5                   | 12.5 ± 0.6  |
|           | 4                     | 7                   | 17 ± 0.8    |
|           |                       | 8                   | 17 ± 0      |
|           | Non-VSH               | 1                   | 1           |
| 2         |                       |                     | 7.5 ± 0.6   |
| 2         |                       | 3                   | 9.5 ± 1     |
|           |                       | 4                   | 9.5 ± 1     |
| 3         |                       | 5                   | 12.5 ± 0.6  |
|           |                       | 6                   | 12.25 ± 1   |
| 4         |                       | 7                   | 17.5 ± 0.6  |
|           |                       | 8                   | 17.25 ± 0.5 |

**Supplementary Table S2. Summary of the DEG sequencing results**

| Sample | Total tags  | Total filtered tags (Illumina) | Total aligned tags | Unique aligned tags |
|--------|-------------|--------------------------------|--------------------|---------------------|
| NVS1   | 21,484,068  | 19,732,362                     | 14,058,950         | 13,821,128          |
| NVS2   | 55,722,219  | 51,128,490                     | 32,018,709         | 31,439,147          |
| NVS3   | 77,733,897  | 65,659,295                     | 44,631,194         | 43,806,021          |
| NVS4   | 49,184,602  | 42,055,054                     | 25,105,271         | 24,657,636          |
| VSH1   | 19,536,465  | 17,840,513                     | 13,934,725         | 13,708,453          |
| VSH2   | 45,777,936  | 41,590,440                     | 32,917,445         | 32,381,647          |
| VSH3   | 50,057,199  | 42,303,321                     | 30,866,091         | 30,271,604          |
| VSH4   | 60,209,077  | 51,028,789                     | 38,568,733         | 37,946,463          |
| FOR2   | 103,455,670 | 89,933,520                     | 84,125,568         | 82,586,953          |
| FOR3   | 52,308,319  | 48,391,543                     | 44,372,926         | 43,564,874          |
| NUR1   | 78,188,150  | 68,124,252                     | 58,293,569         | 57,357,144          |
| NUR2   | 54,007,997  | 46,585,308                     | 43,532,558         | 42,726,909          |
| NUR3   | 27,540,844  | 25,586,890                     | 23,419,313         | 22,977,132          |

**Supplementary Table S3. List of genes differentially expressed in antennae of VSH and NVS bees**

Corresponding *Drosophila* orthologs and log<sub>2</sub> (VSH/NVS ratio) expression values of the fold change and count-per-million are shown.

**(See corresponding excel file)**

**Supplementary Table S4. List of genes differentially expressed in antennae of FOR and NUR bees**

Corresponding *Drosophila* orthologs and log<sub>2</sub> (FOR/NUR ratio) expression values of the fold change and count-per-million are shown.

**(See corresponding excel file)**
